**Lack of statin therapy is associated with plaque instability in non-culprit non-ischemic lesions of diabetic patients – data from the COMBINE OCT-FFR study**B. Berta<sup>1</sup>, T. Roleder<sup>2</sup>, R.S. Hermanides<sup>1</sup>, A.J.J. Ijsselmuiden<sup>3</sup>, F. Alfonso<sup>4</sup>, F. Kauer<sup>5</sup>, J. Escaned<sup>6</sup>, G. De Luca<sup>7</sup>, W. Kennedy<sup>8</sup>, W. Wojakowski<sup>9</sup>, E. Kedhi<sup>10</sup><sup>1</sup>Isala Hospital, Zwolle, Netherlands (The); <sup>2</sup>Regional Specialist Hospital, Research and Development Center, Wrocław, Poland; <sup>3</sup>Amphia Hospital, Breda, Netherlands (The); <sup>4</sup>University Hospital De La Princesa, Madrid, Spain; <sup>5</sup>Albert Schweitzer Hospital, Dordrecht, Netherlands (The); <sup>6</sup>Hospital Clinic San Carlos, Madrid, Spain; <sup>7</sup>University of Eastern Piedmont, Novara, Italy; <sup>8</sup>Beaumont Hospital, Dublin, Ireland; <sup>9</sup>Medical University of Silesia, Department of Cardiology, SHS, Katowice, Poland; <sup>10</sup>St-Jan Hospital, Cardiology Department, Brugge, Belgium**Funding Acknowledgement:** Type of funding source: Private grant(s) and/or Sponsorship. Main funding source(s): The trial is founded from the Department of Cardiology Zwolle Heart-centrum with support from a non-restricted grant from St Jude Medical (now Abbott)**Background:** Effect of statin therapy on coronary plaque stabilisation and reducing adverse cardiovascular events is well known both in primary and secondary prevention. Nevertheless, there is a paucity of data presenting the impact of statins on plaque morphology as assessed by optical coherence tomography (OCT).**Purpose:** The goal of this analysis was to evaluate the plaque morphology using OCT within non-culprit, non-ischaeamic coronary lesions in diabetes mellitus (DM) patients with or without statin pre-treatment.**Methods:** All patients of the COMBINE (FFR-OCT) trial underwent fractional flow reserve (FFR) measurement followed by OCT in FFR negative lesions. OCT recorded the presence of thin-cap fibroatheroma (TCFA), plaque rupture (PR), plaque erosion (PE) and calcified nodule (CN).**Results:** From the 391 patients, 82 (21%) had no statin at baseline. OCT was performed in 463 lesions of which 96 lesions assessed in statin naive and 367 lesions in statin treated group. The median angiographic diame-ter stenosis was 50% and the median FFR value was 0.88 in both groups ( $p=0.953$  and  $p=0.448$ , respectively). Myocardial infarction (MI) at presentation was 16.6% and did not differ between groups ( $p=0.380$ ). Patients without statin pre-treatment were characterized by lower rate of known hypercholesterolemia (47.6% vs. 63.0%;  $p=0.011$ ), male gender (52.4% vs. 65.7%;  $p=0.027$ ), active smokers (8.5% vs. 22.3%;  $p=0.004$ ) and previous MI (22.0% vs. 35.3%;  $p=0.022$ ) as compared to patients with statin pre-treatment, respectively. The results of the qualitative OCT findings see in Table 1.**Conclusions:** Non-ischemic lesions of DM patients without statin pre-treatment showed more vulnerable and instable plaque features like wider lipid arc, thinner fibrotic cap and a higher prevalence of lipid-rich plaque, TCFA and PR suggesting a stabilizing effect of statins on non-ischemic atherosclerotic lesions.

Table 1

|                        | Without statin pre-treatment (n=96) | With statin pre-treatment (n=367) | All lesions (n=463) | p      |
|------------------------|-------------------------------------|-----------------------------------|---------------------|--------|
| Fibroatheroma          | 74 (77.1)                           | 295 (80.4)                        | 369 (79.7)          | 0.474  |
| Calcified plaque       | 84 (87.5)                           | 317 (86.4)                        | 401 (86.6)          | 0.773  |
| Calcium arc (°)        | 147 [89–231]                        | 138 [81–234]                      | 143 [83–234]        | 0.789  |
| Lipid-rich plaque      | 77 (80.2)                           | 242 (65.9)                        | 319 (68.9)          | 0.007  |
| Lipid arc (°)          | 226 [176–272]                       | 180 [129–245]                     | 193 [138–251]       | <0.001 |
| Cap thickness (µm)     | 93 [61–159]                         | 118 [65–200]                      | 112 [64–187]        | 0.008  |
| Thin-cap fibroatheroma | 32 (33.3)                           | 63 (17.2)                         | 95 (20.5)           | <0.001 |
| Plaque rupture         | 16 (16.7)                           | 35 (9.5)                          | 51 (11.0)           | 0.047  |

Values are n (%) or median [first quartile–third quartile].
